1 **The nervous system leverages the non-linear properties of the Achilles tendon to regulate**  
2 **ankle impedance during postural control**

3

4 Kristen L. Jakubowski<sup>1,2,3\*</sup>

5 Daniel Ludvig<sup>1,3</sup>

6 Eric J. Perrault<sup>1,3,4</sup>

7 Sabrina S.M. Lee<sup>2,5</sup>

8

9 <sup>1</sup>Department of Biomedical Engineering, Northwestern University, Evanston, IL

10 <sup>2</sup>Department of Physical Therapy and Human Movement Sciences, Northwestern University,  
11 Chicago, IL

12 <sup>3</sup>Shirley Ryan AbilityLab, Chicago, IL

13 <sup>4</sup>Department of Physical Medicine and Rehabilitation, Northwestern University, Chicago, IL

14 <sup>5</sup>Department of Biomedical Physiology and Kinesiology, Simon Fraser University, Canada

15

16 \* Corresponding author

17 Kristen L. Jakubowski

18 [kjakubowski@u.northwestern.edu](mailto:kjakubowski@u.northwestern.edu)

19

20 **Author contributions:** KLJ, DL, SSML, and EJP conceived of the study and designed the  
21 experimental protocol and analyses. KLJ carried out the experiments, analyzed the data, and  
22 drafted the manuscript. KLJ, DL, SSML, and EJP edited the manuscript. All authors approved the  
23 final version.

24 **ABSTRACT**

25       Regulating ankle impedance is essential for controlled interactions with the environment and  
26 rejecting unexpected disturbances. Ankle impedance in the sagittal plane depends strongly on the  
27 triceps surae and Achilles tendon, but their relative contributions remain unknown. It is commonly  
28 assumed that ankle impedance is controlled by changing muscle activation and, thereby, muscle  
29 impedance, but this ignores the fact that tendon impedance also changes with loading caused by  
30 increases in muscle activation. Thus, we sought to determine the relative contributions from the  
31 triceps surae and Achilles tendon during conditions relevant to postural control. We used a novel  
32 technique that combines B-mode ultrasound imaging with joint-level perturbations to quantify  
33 ankle, muscle, and tendon impedance simultaneously across activation levels from 0 – 30% of  
34 maximum voluntary contraction. We found that muscle and tendon stiffness, the static component  
35 of impedance, increased with voluntary plantarflexion contractions, but that muscle stiffness  
36 exceeded tendon stiffness at very low loads ( $21 \pm 7$  N). Above these loads, corresponding to 1.3%  
37 of maximal strength for an average participant in our study, ankle stiffness was determined  
38 predominately by Achilles tendon stiffness. Hence, the nervous system leverages the non-linear  
39 properties of the Achilles tendon to increase ankle stiffness during postural conditions.

40

41 **WORD COUNT: (199/200 WORDS)**

42

43 **KEYWORDS (6/6 WORDS)**

44 Muscle, tendon, ankle, impedance, stiffness, ultrasound imaging

## 45 **BACKGROUND**

46 The ability to adapt the mechanical properties of the ankle is essential for seamlessly  
47 transitioning across different terrains when walking and for maintaining postural stability when  
48 unexpectedly perturbed [1, 2]. The triceps surae muscles and the Achilles tendon are the primary  
49 determinants of ankle mechanics in the sagittal plane, but their relative contributions remain  
50 largely unknown. It is commonly assumed that changes in ankle mechanics during active  
51 contractions are largely determined by the activation-dependent properties of muscle [3-5], but  
52 there have been limited *in vivo* measurements validating this presumption. Determining how the  
53 triceps surae and Achilles tendon mechanics contribute to ankle mechanics across a broad range  
54 of physiological conditions would provide fundamental insight into the mechanisms underlying  
55 humans' ability to navigate their physical world. Such knowledge could also aid in developing  
56 targeted interventions when musculotendon mechanics are altered due to neuromuscular  
57 pathologies, or biomimetic assistive devices [4, 6]. As such, we sought to determine the relative  
58 contribution from the triceps surae and Achilles tendon to the mechanics of the ankle.

59 The assumed primary role of muscle in determining the mechanical properties of the ankle is  
60 based on two assumptions. The first is that muscle impedance is substantially lower than tendon  
61 impedance for most physiological conditions. Impedance—a quantitative measure of mechanics—  
62 describes the dynamic relationship between an imposed displacement and the evoked forces or  
63 torques [7]. Due to the serial connection between the muscle and tendon, ankle impedance will be  
64 determined mainly by the component with the lowest impedance when the impedance of each  
65 component differs substantially. The Achilles tendon is long and compliant [8, 9], and its  
66 impedance relative to that of the triceps surae is unknown. Therefore, muscle impedance may not  
67 be substantially lower than tendon impedance during physiologically relevant conditions.

68 The second assumption is that tendon impedance is constant across loads and that changes in  
69 joint impedance must therefore be due to changes in muscle impedance. Nearly all experimental  
70 studies quantifying muscle and tendon mechanics have focused on stiffness, the static component  
71 of impedance. It is well known from *in vivo* experiments that muscle stiffness changes with the  
72 activation-dependent changes in muscle force [10, 11]. Several studies have measured tendon  
73 stiffness *in vivo*, but often relying on the assumption that it remains constant across loads [12-15].  
74 While this is a reasonable assumption at high loads (above approximately 30% of maximum force)  
75 [16, 17], tendons have a non-linear stress-strain relationship that results in load-dependent stiffness

76 properties in the lower load regime within the “toe-region” [16, 17]. Ultimately, accounting for the  
77 non-linear properties of the tendon could impact the relative contributions from the muscle and  
78 tendon to the stiffness of the joint.

79 There is conflicting experimental evidence on how triceps surae and Achilles tendon stiffness  
80 vary with respect to each other and their relative contributions to ankle stiffness. This stems from  
81 the fact that few studies have examined muscle and tendon stiffness over a wide range of loads  
82 relevant to common functional tasks. Previously, it has been observed that tendon stiffness is  
83 greater than muscle in experiments that only considered activation levels above approximately  
84 30% of the maximum voluntary contraction (MVC) [12]. In contrast, others have observed that  
85 the Achilles tendon is more compliant than the triceps surae during standing [18], which typically  
86 occurs around 15% MVC [19]. These conflicting results may be due partly to differences in the  
87 tested range of muscle activations. To our knowledge, no one has bridged the gap between these  
88 estimates and quantified the relative contribution from the muscle and tendon across a range of  
89 activations that are relevant to many functional tasks.

90 The objective of this study was to determine how the triceps surae and Achilles tendon  
91 contribute to the impedance of the ankle during conditions relevant to postural control. We used  
92 an innovative technique that combines joint-level perturbations with B-mode ultrasound to  
93 quantify ankle, muscle, and tendon impedance [20]. Given the limited and conflicting experimental  
94 data reported in the literature, we tested the null hypothesis that the muscle and tendon contribute  
95 equally to ankle impedance to determine which structure was most dominant over contraction  
96 levels ranging from 0 to 30% MVC. Our results help determine the mechanisms contributing to  
97 the regulation of human ankle impedance, as needed for seamless interactions with the  
98 environment. As a secondary objective, we quantified the frequency ranges over which muscles  
99 and tendons behave elastically. Though there are conditions for which muscles and tendons exhibit  
100 spring-like behavior, both structures are viscoelastic [21, 22]. Until recently [20], it has not been  
101 possible to quantify muscle and tendon impedance *in vivo* in humans. As such, it is unknown under  
102 which conditions it is reasonable to assume that muscles and tendons behave as simple springs  
103 with only a stiffness component and when they exhibit more complex mechanical properties. We,  
104 therefore, quantified these regimes in this study.

105

## 106 **METHODS**

### 107 *Participants*

108       Seventeen healthy young adults (age =  $27 \pm 3$  years (mean  $\pm$  standard deviation); height = 1.7  
109  $\pm 0.1$  m; body mass =  $73 \pm 15$  kg, 8 males and 9 females) participated in this experiment. All  
110 participants were right leg dominant and had no history of neuromuscular or musculoskeletal  
111 injuries to their right leg. All participants provided informed consent prior to participation. The  
112 Northwestern University Institutional Review Board approved the study, and all methods were  
113 carried out according to the approved protocols (STU00009204 & STU00213839).

114

### 115 *Experimental setup*

116       Participants were seated in an adjustable chair (Biodex Medical Systems, Inc. Shirley, NY),  
117 with their trunk and torso stabilized with safety straps (Fig 1). Participants' right leg was extended  
118 in front of them with their knee flexed at  $15^\circ$ . A knee brace (Innovator DLX, Ossur, Reykjavik,  
119 Iceland) stabilized the knee in this position. The participant's right foot was attached rigidly to an  
120 electric rotary motor (BSM90N-3150AF, Baldor, Fort Smith, AR) via a custom-made fiberglass  
121 cast at an ankle angle of  $90^\circ$ . The cast encased the entire foot, extending distally from the medial  
122 and lateral malleoli to the toes, thus preserving the full range-of-motion of the ankle but preventing  
123 any movement of the foot or toes. The axis of rotation of the motor was aligned with the ankle  
124 center of rotation in the sagittal plane, restricting all movement to the plantarflexion/dorsiflexion  
125 direction. Electrical and mechanical safety stops limited the rotation of the motor within the  
126 participant's range of motion. A 24-bit quadrature encoder integrated with the motor measured  
127 ankle angle (24-bit, PCI-QUAD04, Measurement Computing, Norton, MA), while a 6-degree-of-  
128 freedom load cell (45E15A4, JR3, Woodland, CA) measured all ankle forces and torques.  
129 Throughout the experiment, the motor was controlled in real-time via xPC target (MATLAB,  
130 Mathworks, Natick, MA).

131       Single differential bipolar surface electrodes (Bagnoli, Delsys Inc, Boston, MA) measured  
132 muscle activity from the medial and lateral gastrocnemius and soleus (ankle plantarflexors) and  
133 the tibialis anterior (ankle dorsiflexor). Standard skin preparation methods were performed prior  
134 to electrode placement [23], and electrodes were placed on the belly of the muscle.  
135 Electromyography (EMG) signals were amplified to maximize the signal resolution in each  
136 channel. EMG data were collected for visual feedback provided to the subjects. All analog data

137 were passed through an antialiasing filter (500 Hz using a 5-pole Bessel filter) and sampled at 2.5  
138 kHz (PCI-DAS1602/16, Measurement Computing, Norton, MA, USA).

139 A B-mode ultrasound system using a linear transducer (LV7.5/60/128Z-2, LS128, CExt,  
140 Telemed, Lithuania) recorded images of the medial gastrocnemius muscle-tendon junction (MTJ).  
141 A custom-made probe holder and elastic adhesive wrap (Coban™, 3M, St. Paul, MN) secured the  
142 probe to the leg. We positioned the ultrasound probe to center the MTJ on the image. At the start  
143 of ultrasound data collection, a trigger signal was used to synchronize the ultrasound data  
144 collection with all other measurements. Ultrasound images were acquired with a mean frame rate  
145 of 124 Hz. All ultrasound data were saved for processing offline.

146

#### 147 *Protocol*

148 At the start of each experiment, we collected three 10-second isometric maximum voluntary  
149 contractions (MVC) trials in both the plantarflexion and dorsiflexion directions. These data were  
150 used to scale the visual feedback provided to the participants.

151 Our primary objective was to determine how muscle, tendon, and ankle impedance vary across  
152 various levels of plantarflexion torque. This was accomplished by instructing participants to  
153 produce different levels of isometric plantarflexion torque while the rotary motor applied small  
154 rotational perturbations in the sagittal plane. We used pseudo-random binary sequence (PRBS)  
155 perturbations with an amplitude of 0.175 radians, a maximum velocity of 1.75 radians per second,  
156 and a switching time of 153 ms. We tested seven isometric plantarflexion torque levels from 0%  
157 to 30% MVC in 5% increments. Participants were provided real-time visual feedback of their  
158 normalized plantarflexion torque. Tibialis anterior EMG was also provided to prevent co-  
159 contraction. Rectified EMG and torque signals were low pass filtered at 1 Hz to remove high-  
160 frequency components from the applied perturbations (2<sup>nd</sup> order Butterworth). Subjects completed  
161 three trials at each level of plantarflexion torque in a randomized fashion. Each trial lasted 65  
162 seconds. Rest breaks were provided as needed between trials to prevent fatigue.

163 The measured ankle torque included the gravitational and inertial contributions from the  
164 apparatus connecting the foot to the motor. A single trial was collected with only the cast attached  
165 to the rotary motor enabling us to remove these contributions from the net torque measured in each  
166 trial.

167

168 *Data processing and analysis*

169 All data were processed and analyzed using custom-written software in MATLAB. The same  
170 individual manually digitized the MTJ within each frame of the ultrasound videos [20]. All  
171 ultrasound data were resampled using linear interpolation to match the sampling rate of the other  
172 experimental signals (2.5 kHz).

173 We computed ankle, muscle, and tendon impedance as described previously [20]. Briefly, we  
174 used non-parametric system identification to estimate ankle, muscle, and tendon impedance from  
175 the experimental measures of ankle angle, ankle torque, and displacement of the MTJ (Fig 2). We  
176 quantified ankle impedance as the relationship between the imposed ankle rotations and the  
177 resultant ankle torque [7]. Measurement of the MTJ motion allowed us to estimate muscle and  
178 tendon impedance under the assumption that the muscle and tendon are connected in series [24],  
179 and that the displacement of the muscle-tendon unit is determined by the angular rotation of the  
180 ankle multiplied by the Achilles tendon moment arm. We refer to the relationship between MTJ  
181 displacement and the angular rotations of the ankle as the translation ratio. Specifically, to  
182 characterize ankle, muscle, and tendon impedance, we estimated ankle impedance and the  
183 translation ratio, and used these quantities to compute muscle and tendon impedance [20]. We  
184 previously demonstrated that the magnitude of the frequency response functions was nearly  
185 constant from 1 to 3 Hz, indicating that stiffness was the dominant contributor to impedance over  
186 this frequency range [20]. As such, we computed the stiffness component of ankle, muscle, and  
187 tendon impedance by averaging the magnitude of the respective frequency response functions from  
188 1 to 3 Hz. Our primary analysis will focus on the stiffness component of impedance due to its  
189 relevance in the control of posture and movement at the ankle [25].

190 A single approximation of the Achilles tendon moment arm (51.4 mm) was used for all  
191 analyses. This was estimated as the mean across subjects from Clarke et al. [26] with an ankle  
192 angle of 90°. It has been demonstrated that the Achilles tendon moment arm does not scale with  
193 anthropometric data [26, 27]. Additionally, system identification is a quasi-linear approximation  
194 about a single operating point, which, in our study, was 90°. Therefore, we approximated the  
195 moment arm as a single value.

196 Ankle and tendon stiffness varied non-linearly with plantarflexion torque (or musculotendon  
197 force). Therefore, the ankle and tendon stiffness experimental data were fit with non-linear models

198 to synthesize our results. The model used to characterize torque-dependent changes in ankle  
199 stiffness was:

$$200 \quad K_A = \frac{\beta \cdot Torque \cdot K_{A1}}{\beta \cdot Torque + K_{A1}} + K_{A0} \quad (1)$$

201 in which  $K_A$  represents the modeled ankle stiffness,  $Torque$  was the input to the model,  $\beta$ ,  $K_{A1}$  and  
202  $K_{A0}$  are the optimized parameters. A similar model has been used to characterize load-dependent  
203 changes in the stiffness of a muscle-tendon unit [28].

204 Tendon stiffness was modeled by an exponential function:

$$205 \quad K_T = K_{Tmax} + a \cdot \exp(-b \cdot force) \quad (2)$$

206 in which  $K_T$  represents the modeled tendon stiffness, musculotendon  $force$  was the input to the  
207 model, and  $K_{Tmax}$ ,  $a$ , and  $b$  are the optimized parameters. This model was chosen since exponential  
208 models have been used previously to characterize the non-linear toe-region of the tendon stress-  
209 strain curve [29]. We computed musculotendon force by dividing the measured ankle torque by  
210 the Achilles tendon moment arm.

211  
212 *Sensitivity analyses*

213 We evaluated the sensitivity of ankle stiffness to changes in muscle and tendon stiffness at  
214 different levels of force. We first consider that ankle stiffness ( $K_A$ ) is determined by the serial  
215 connection of the muscle and tendon and can be described as a function of these stiffnesses [20],  
216 such that:

$$217 \quad K_A = \frac{K_M \cdot K_T}{K_M + K_T} r^2 \quad (3)$$

218 where  $r$  represents the Achilles tendon moment arm in the sagittal plane,  $K_M$  represents muscle  
219 stiffness, and  $K_T$  represents tendon stiffness. This relationship was used to derive the sensitivity of  
220 ankle stiffness to muscle and tendon stiffness using Eq 4, where  $S_x$  is the relative sensitivity to a  
221 given parameter  $x$  (either muscle or tendon stiffness).

$$222 \quad S_x = \frac{\partial K_A / \partial K_x}{K_A / K_x} \quad (4)$$

223 The average values of muscle and tendon stiffness estimated from our experiment were used to  
224 compute numerical values for the sensitivity of ankle stiffness.

225



## 226 *Statistical analysis*

227 We sought to determine how the triceps surae and Achilles tendon contribute to the impedance  
228 of the ankle over a range of activation levels. Non-linear mixed-effects models were used to  
229 characterize the ankle stiffness–torque relationship and the tendon stiffness–force relationship (Eq  
230 1 & 2). A linear mixed-effects model was used to describe the muscle stiffness–musculotendon  
231 force relationship. For all models, subject was treated as a random factor, and plantarflexion torque  
232 or musculotendon force was a continuous factor. A restricted maximum likelihood method was  
233 used to estimate all models [30]. The model fit for ankle, muscle, and tendon stiffness was assessed  
234 by quantifying the coefficient of determination ( $R^2$ ) for each participant from the respective mixed-  
235 effects model. We tested the null hypothesis that the muscle and tendon contribute equally to ankle  
236 stiffness. We used a bootstrapping procedure to determine the range of musculotendon forces when  
237 muscle and tendon stiffness were not significantly different from each other to a level of  $p > 0.05$ .  
238 The bootstrapping involved randomly resampling the data from each subject with replacement to  
239 create a new dataset for the entire pool of subjects. This process was repeated 200 times. Each  
240 synthesized dataset was analyzed as described above to create a distribution of estimates for which  
241 muscle and tendon stiffnesses were the same. Our null hypothesis—that muscle and tendon  
242 stiffness contribute equally to the stiffness of the ankle—was accepted within the 95% confidence  
243 intervals of this distribution and rejected elsewhere. All metrics reported are mean  $\pm$  95%  
244 confidence intervals unless otherwise noted.

245

## 246 **RESULTS**

### 247 *Muscle stiffness exceeded tendon stiffness at low loads*

248 At all levels of activation, the magnitudes of the frequency response functions for muscle and  
249 tendon impedance were nearly constant from 1 – 6.5 Hz (Fig 3), indicating that stiffness is the  
250 primary contributor to impedance at these frequencies. Therefore, it is reasonable to assume that  
251 muscle and tendon behave as simple springs during the conditions tested and over this frequency  
252 range, which is not impacted by changes in load.

253 Muscle and tendon stiffness increased with increases in musculotendon force (Fig 4). Figure  
254 4A displays the experimental measures and model fits from an individual subject. The muscle and  
255 tendon stiffness models fit the data well for the representative subject (muscle:  $R^2 = 0.94$ ; tendon:  
256  $R^2 = 0.91$ ), and across the entire group (muscle:  $R^2 = 0.94 \pm 0.01$ ; tendon:  $R^2 = 0.94 \pm 0.01$ ).

257 We found that muscle stiffness increased at a greater rate with increases in force than tendon  
258 stiffness. A representative participant shown in Fig 4A, illustrates that muscle stiffness was greater  
259 than tendon stiffness at 21 N (solid line). This trend was consistent across all subjects. We observed  
260 that muscle stiffness exceeded tendon stiffness at  $21 \pm 7$  N (Fig 4B). The musculotendon force  
261 where muscle stiffness exceeded tendon stiffness (21 N) occurred at a very low contraction level,  
262 corresponding to  $1.5 \pm 0.2\%$  of the maximum voluntary torque across all subjects. At the highest  
263 force tested in this study,  $\sim 830$  N, the muscle was approximately 6.6 times stiffer than the tendon.

264

265 *Ankle stiffness was most sensitive to changes in tendon stiffness*

266 A unique feature of our measurement technique is that we were able to quantify ankle, muscle,  
267 and tendon stiffness simultaneously, enabling us to quantify the relative contributions from the  
268 muscle and tendon to the stiffness of the joint. As others have reported [3, 7, 31], we found that  
269 ankle stiffness increased with voluntary contraction (Fig. 5). This increase was non-linear and  
270 described well by Eq. 1 for individual subjects (Fig. 5A;  $R^2 = 0.99$ ), and the full population of  
271 tested subjects (Fig. 5B;  $R^2 = 0.98 \pm 0.007$ ). Our values of ankle stiffness are consistent with  
272 previous reports using a similar experimental protocol [32].

273 We completed a sensitivity analysis to quantify how changes in muscle and tendon stiffness  
274 influence ankle stiffness across the range of tested forces (Fig 6). As expected, ankle stiffness was  
275 most sensitive to the tendon for forces above 21 N, where tendon stiffness became lower than  
276 muscle stiffness. For forces above 350 N, corresponding to approximately 20% MVC in our  
277 population of subjects, ankle stiffness was nearly 4 times more sensitive to changes in tendon  
278 stiffness than to changes in muscle stiffness. The importance of tendon stiffness for determining  
279 ankle stiffness increased at further contraction levels. These results provide additional evidence  
280 that the mechanical properties of the human ankle are determined primarily by the non-linear  
281 mechanical properties of the Achilles tendon.

282

## 283 **DISCUSSION**

284 Regulating ankle impedance is critical when adapting to varying environmental conditions and  
285 responding to postural disturbances. This study sought to determine how the triceps surae and  
286 Achilles tendon contribute to the sagittal plane impedance of the ankle over a range of activation  
287 levels. We used our novel technique to quantify ankle, muscle, and tendon impedance

288 simultaneously [20]. We found that both muscle and tendon impedance increased with activation,  
289 and that both had spring-like properties for frequencies below approximately 6.5 Hz. Muscle  
290 stiffness exceeded tendon stiffness beyond the lowest forces and levels of activation ( $\sim 21$  N or  
291  $\sim 1.5 \pm 0.2\%$  MVC). The stiffness of the human ankle during plantarflexion is determined largely  
292 by the net stiffness of the serially connected Achilles tendon and triceps surae muscles. Because  
293 springs connected in series have a net stiffness that is limited by the most compliant (least stiff)  
294 element, our results indicate that the mechanical properties of the Achilles tendon, a passive  
295 structure, have a substantial impact on the activation-dependent increases in ankle stiffness at  
296 almost all levels of muscle activation. This finding is in contrast to the common assumption that  
297 the regulation of ankle stiffness is directly linked to activation-dependent changes in muscle  
298 stiffness [3-5]. Instead, our results suggest that the nervous system leverages the non-linear  
299 properties of the Achilles tendon to increase ankle stiffness during postural conditions. This is a  
300 fundamental shift in the assumed roles of the muscle and tendon and our current understanding of  
301 how muscle and tendon impedance contribute to the impedance of the ankle.

302

### 303 *Characteristics of triceps surae and Achilles tendon impedance*

304 We found that muscle and tendon have spring-like properties below approximately 6.5 Hz, as  
305 indicated by the nearly constant-valued impedance frequency response functions (Fig 3). This  
306 result implies that viscous and inertial properties of the muscle and tendon are small relative to  
307 stiffness over this frequency range. This result is consistent with testing in excised tendons, where  
308 it has been found that the estimated tendon mechanical properties are invariant with respect to the  
309 frequency of the applied stretch up to 11 Hz [33, 34]. It is also consistent with previous findings  
310 within feline muscle, where the muscle behaves elastically in response to small stochastic  
311 perturbations over a similar frequency range to what we tested [35]. Our measured response in  
312 muscle suggests that our measurements remained within its short-range stiffness region [10].  
313 Muscle short-range stiffness describes the initial response to small, fast displacements prior to  
314 reflexive or volitional muscle activation and is critical in the control of posture and limb stability  
315 [35, 36]. This finding is consistent with our previous results that demonstrated that our muscle  
316 stiffness estimates are similar to measurements of muscle short-range stiffness scaled to the triceps  
317 surae [20]. We do note, however, that if the stretch within the muscle or tendon was larger or  
318 slower, we would expect to observe more complex viscoelastic behavior. For example, when a

319 larger stretch is applied to a muscle, the response is no longer purely elastic [10]. Similarly, within  
320 tendon, when stretch velocity is slower, the mechanical properties of the tendon decrease [37].

321 Our estimated values of muscle stiffness were larger than the few previous reports that  
322 attempted to quantify the stiffness of the human triceps surae muscle *in vivo*. This is likely due to  
323 the small size of our perturbations compared to earlier studies. All previous estimates of human  
324 triceps surae muscle stiffness used perturbations at least twice as large as those we applied (20° or  
325 larger) [12, 38]. Previously, Hauraix et al. [12] reported a triceps surae muscle stiffness value of  
326 218 N/mm at 40% MVC, while Clark et al. [38] reported a muscle stiffness of 118 N/mm at 25%  
327 MVC. For comparison, we estimate muscle stiffness to be 261 N/mm at 25% MVC for an average  
328 participant in our study. Muscle stiffness varies based on the size of the applied perturbation [10].  
329 Therefore, given the difference in perturbation size, it was expected that the previously reported  
330 muscle stiffness values would be lower than our results. Our novel *in vivo* estimates of muscle  
331 stiffness may be especially pertinent for stability and the response to unexpected postural  
332 disturbances when the short-range stiffness of the muscle is important.

333 The observed increase in tendon stiffness with increases in musculotendon force suggests that  
334 the Achilles tendon was within the non-linear toe-region of its stress-strain curve during our  
335 experiments (Fig 4). Tendons exhibit a strain-dependent increase in stiffness at low strains (e.g.,  
336 the toe-region of the stress-strain curve) [16]. While Achilles tendon stiffness has been  
337 characterized before [12-15], previous studies have only estimated its stiffness above 30% MVC  
338 to satisfy the methodological assumption that tendon stiffness is constant. Our approach is not  
339 constrained by this assumption, allowing measurements to be made at lower forces corresponding  
340 to activation levels that occur during everyday activities like standing and walking [19].

341

### 342 *Limitations*

343 Our technique for estimating muscle and tendon stiffness assumes that all plantarflexion torque  
344 is transmitted through the Achilles tendon to the triceps surae, omitting contributions from other  
345 structures that span the joint (e.g., the joint capsule and other musculotendon units) [20]. This  
346 assumption is valid during plantarflexion contractions, when the musculotendon force from the  
347 triceps surae is significantly greater than contributions from other sources. However, other  
348 structures can have a substantial effect relative to Achilles tendon force when the ankle is passively  
349 dorsiflexed. To mitigate their contributions, we positioned the ankle in a neutral position where

350 passive torque is minimal [39]. We may still be overestimating muscle and tendon stiffness during  
351 passive conditions, but this limitation will have a negligible impact on our main conclusions when  
352 the triceps surae are active.

353

### 354 *Functional implications and Conclusions*

355 While the data presented was during isometric conditions, our findings may explain an  
356 underlying physiological mechanism of previous estimates of ankle impedance during walking.  
357 Rouse et al. [40] observed that ankle stiffness estimated using perturbations of ankle posture during  
358 the stance phase of walking was similar to that estimated by the slope of the ankle torque – ankle  
359 angle relationship, also known as quasi-stiffness. This was surprising since these two estimation  
360 approaches can only yield the same results if the system is purely elastic and passive [41].  
361 However, it is well documented that the triceps surae are active during the stance phase of  
362 locomotion [8, 40]. One possible explanation for the Rouse et al. [40] findings is that ankle  
363 stiffness was determined primarily by the Achilles tendon—a passive elastic structure—during the  
364 stance phase of walking, where it has been shown that muscle fascicle length changes are modest  
365 [8, 9], as in our postural experiment.

366 We observed that the Achilles tendon is less stiff than the triceps surae at almost all loads, but  
367 these results may not apply to other muscle-tendon units. For the Achilles tendon, the compliance  
368 of the tendon is essential for the storage and return of elastic energy, increasing the economy of  
369 locomotion [8, 9, 42, 43]. However, the mechanical properties of the muscle relative to the tendon  
370 will depend upon the functional role of each muscle-tendon unit and its corresponding architecture  
371 [44]. For example, muscles that have a similar fascicle length and tendon slack length have been  
372 termed “stiff”, while muscles where the fascicles are much shorter than the tendon—like the triceps  
373 surae—have been termed “compliant” [16]. It is almost certain that muscles in the former category  
374 will contribute more to the stiffness of the joint that they cross.

375 Finally, our results have implications for targeted rehabilitation. Changes in Achilles tendon  
376 stiffness that occur as a result of injury [45], or healthy aging [46] will impact ankle stiffness. For  
377 example, our results suggest that the previously reported age-related decrease in Achilles tendon  
378 stiffness will decrease the stiffness of the ankle for a fixed level of contraction [47]. This decrease  
379 could impair the control of posture and movement. To improve balance during tasks that require  
380 effective ankle stabilization, altering muscle stiffness through strength training might be less

381 effective than increasing tendon stiffness through high magnitude loading [48, 49]. Ultimately,  
382 understanding the relative contributions from the muscle and tendon advances our fundamental  
383 understanding of how ankle stiffness is varied for an individual's interactions with their physical  
384 world, and aids in developing targeted interventions when musculotendon mechanics are altered  
385 as a result of neuromuscular pathologies or aging.

386

### 387 **FUNDING**

388 Research reported in this publication was supported by the National Institute On Aging of the  
389 National Institutes of Health under Award Number F31AG069412. The content is solely the  
390 responsibility of the authors and does not necessarily represent the official views of the National  
391 Institutes of Health. Research supported by the American Society of Biomechanics' Graduate  
392 Student Grant-in-aid.

393 **REFERENCE:**

- 394 [1] M. W. Whitmore, L. J. Hargrove, and E. J. Perreault, "Altered Neural Control Reduces  
395 Shear Forces and Ankle Impedance on a Slippery Surface," *IEEE Trans Biomed Eng*, vol.  
396 66, no. 8, pp. 2381-2389, Aug 2019, doi: 10.1109/TBME.2018.2889624.
- 397 [2] J. M. Finley, Y. Y. Dhaher, and E. J. Perreault, "Contributions of feed-forward and  
398 feedback strategies at the human ankle during control of unstable loads," *Experimental*  
399 *brain research*, vol. 217, no. 1, pp. 53-66, 2012.
- 400 [3] P. Weiss, I. Hunter, and R. Kearney, "Human ankle joint stiffness over the full range of  
401 muscle activation levels," *Journal of biomechanics*, vol. 21, no. 7, pp. 539-544, 1988.
- 402 [4] M. Sartori, M. Maculan, C. Pizzolato, M. Reggiani, and D. Farina, "Modeling and  
403 simulating the neuromuscular mechanisms regulating ankle and knee joint stiffness during  
404 human locomotion," *Journal of neurophysiology*, vol. 114, no. 4, pp. 2509-2527, 2015.
- 405 [5] C. Cook and M. McDonagh, "Measurement of muscle and tendon stiffness in man,"  
406 *European journal of applied physiology and occupational physiology*, vol. 72, no. 4, pp.  
407 380-382, 1996.
- 408 [6] M. Sartori and G. S. Sawicki, "Closing the loop between wearable technology and human  
409 biology: a new paradigm for steering neuromuscular form and function," *Progress in*  
410 *Biomedical Engineering*, vol. 3, no. 2, p. 023001, 2021.
- 411 [7] R. E. Kearney and I. W. Hunter, "System identification of human joint dynamics," *Critical*  
412 *reviews in biomedical engineering*, vol. 18, no. 1, pp. 55-87, 1990.
- 413 [8] T. Fukunaga, K. Kubo, Y. Kawakami, S. Fukushima, H. Kanehisa, and C. N. Maganaris,  
414 "In vivo behaviour of human muscle tendon during walking," *Proceedings of the Royal*  
415 *Society of London. Series B: Biological Sciences*, vol. 268, no. 1464, pp. 229-233, 2001.
- 416 [9] D. J. Farris and G. S. Sawicki, "Human medial gastrocnemius force-velocity behavior  
417 shifts with locomotion speed and gait," *Proc Natl Acad Sci U S A*, vol. 109, no. 3, pp. 977-  
418 82, Jan 17 2012, doi: 10.1073/pnas.1107972109.
- 419 [10] P. M. Rack and D. R. Westbury, "The short range stiffness of active mammalian muscle  
420 and its effect on mechanical properties," *J Physiol*, vol. 240, no. 2, pp. 331-50, Jul 1974,  
421 doi: 10.1113/jphysiol.1974.sp010613.
- 422 [11] L. Cui, E. J. Perreault, H. Maas, and T. G. Sandercock, "Modeling short-range stiffness of  
423 feline lower hindlimb muscles," *Journal of biomechanics*, vol. 41, no. 9, pp. 1945-1952,  
424 2008.
- 425 [12] H. Hauraix, A. Fouré, S. Dorel, C. Cornu, and A. Nordez, "Muscle and tendon stiffness  
426 assessment using the alpha method and ultrafast ultrasound," *European journal of applied*  
427 *physiology*, vol. 115, no. 7, pp. 1393-1400, 2015.
- 428 [13] G. Lichtwark and A. Wilson, "In vivo mechanical properties of the human Achilles tendon  
429 during one-legged hopping," *Journal of Experimental Biology*, vol. 208, no. 24, pp. 4715-  
430 4725, 2005.
- 431 [14] S. Farcy, A. Nordez, S. Dorel, H. Hauraix, P. Portero, and G. Rabita, "Interaction between  
432 gastrocnemius medialis fascicle and Achilles tendon compliance: a new insight on the  
433 quick-release method," *Journal of Applied Physiology*, vol. 116, no. 3, pp. 259-266, 2013.
- 434 [15] T. M. Ackermans *et al.*, "Aging and the effects of a half marathon on Achilles tendon force-  
435 elongation relationship," *Eur J Appl Physiol*, vol. 116, no. 11-12, pp. 2281-2292, Dec 2016.
- 436 [16] F. E. Zajac, "Muscle and tendon Properties models scaling and application to biomechanics  
437 and motor.," *Critical reviews in biomedical engineering*, vol. 17, no. 4, pp. 359-411, 1989.

- 438 [17] U. Proske and D. Morgan, "Tendon stiffness: methods of measurement and significance  
439 for the control of movement. A review," *Journal of biomechanics*, vol. 20, no. 1, pp. 75-  
440 82, 1987.
- 441 [18] I. D. Loram, C. N. Maganaris, and M. Lakie, "The passive, human calf muscles in relation  
442 to standing: the short range stiffness lies in the contractile component," *The Journal of*  
443 *physiology*, vol. 584, no. 2, pp. 677-692, 2007.
- 444 [19] K. Nagai, M. Yamada, K. Uemura, Y. Yamada, N. Ichihashi, and T. Tsuboyama,  
445 "Differences in muscle coactivation during postural control between healthy older and  
446 young adults," *Archives of gerontology and geriatrics*, vol. 53, no. 3, pp. 338-343, 2011.
- 447 [20] K. L. Jakubowski, D. Ludvig, D. Bujnowski, S. S. Lee, and E. J. Perreault, "Simultaneous  
448 quantification of ankle, muscle, and tendon impedance in humans," *IEEE Transactions on*  
449 *Biomedical Engineering*, 2022.
- 450 [21] J. Peltonen, N. J. Cronin, L. Stenroth, T. Finni, and J. Avela, "Viscoelastic properties of  
451 the Achilles tendon in vivo," *Springerplus*, vol. 2, no. 1, pp. 1-8, 2013.
- 452 [22] R. Moss and W. Halpern, "Elastic and viscous properties of resting frog skeletal muscle,"  
453 *Biophysical Journal*, vol. 17, no. 3, pp. 213-228, 1977.
- 454 [23] H. Tankisi *et al.*, "Standards of instrumentation of EMG," *Clinical neurophysiology*, vol.  
455 131, no. 1, pp. 243-258, 2020.
- 456 [24] A. V. Hill, "The heat of shortening and the dynamic constants of muscle," *Proceedings of*  
457 *the Royal Society of London. Series B-Biological Sciences*, vol. 126, no. 843, pp. 136-195,  
458 1938.
- 459 [25] D. Ludvig, M. W. Whitmore, and E. J. Perreault, "Leveraging joint mechanics simplifies  
460 the neural control of movement," *Frontiers in Integrative Neuroscience*, vol. 16, p. 802608,  
461 2022.
- 462 [26] E. C. Clarke, J. H. Martin, A. G. d'Entremont, M. G. Pandy, D. R. Wilson, and R. D.  
463 Herbert, "A non-invasive, 3D, dynamic MRI method for measuring muscle moment arms  
464 in vivo: demonstration in the human ankle joint and Achilles tendon," *Med Eng Phys*, vol.  
465 37, no. 1, pp. 93-9, Jan 2015.
- 466 [27] F. T. Sheehan, "The 3D in vivo Achilles' tendon moment arm, quantified during active  
467 muscle control and compared across sexes," *J Biomech*, vol. 45, no. 2, pp. 225-30, Jan 10  
468 2012.
- 469 [28] D. L. Morgan, "Separation of active and passive components of short-range stiffness of  
470 muscle," *American Journal of Physiology-Cell Physiology*, vol. 232, no. 1, pp. 45-49,  
471 1977.
- 472 [29] G. Lichtwark and A. Wilson, "Optimal muscle fascicle length and tendon stiffness for  
473 maximising gastrocnemius efficiency during human walking and running," *Journal of*  
474 *theoretical biology*, vol. 252, no. 4, pp. 662-673, 2008.
- 475 [30] S. G. Luke, "Evaluating significance in linear mixed-effects models in R," *Behavior*  
476 *research methods*, vol. 49, no. 4, pp. 1494-1502, 2017.
- 477 [31] I. W. Hunter and R. E. Kearney, "Dynamics of human ankle stiffness: variation with mean  
478 ankle torque," *J Biomech*, vol. 15, no. 10, pp. 747-52, 1982, doi: 10.1016/0021-  
479 9290(82)90089-6.
- 480 [32] R. E. Kearney and I. W. Hunter, "Dynamics of human ankle stiffness: variation with  
481 displacement amplitude," *J Biomech*, vol. 15, no. 10, pp. 753-6, 1982.
- 482 [33] M. Bennett, R. Ker, N. J. Imery, and R. M. Alexander, "Mechanical properties of various  
483 mammalian tendons," *Journal of Zoology*, vol. 209, no. 4, pp. 537-548, 1986.



- 484 [34] H. Schechtman and D. Bader, "Dynamic characterization of human tendons," *Proceedings*  
485 *of the Institution of Mechanical Engineers, Part H: Journal of Engineering in Medicine*,  
486 vol. 208, no. 4, pp. 241-248, 1994.
- 487 [35] R. F. Kirsch, D. Boskov, and W. Z. Rymer, "Muscle stiffness during transient and  
488 continuous movements of cat muscle: perturbation characteristics and physiological  
489 relevance," *IEEE Transactions on Biomedical Engineering*, vol. 41, no. 8, pp. 758-770,  
490 1994.
- 491 [36] E. J. Perreault, R. F. Kirsch, and P. E. Crago, "Multijoint dynamics and postural stability  
492 of the human arm," *Exp Brain Res*, vol. 157, no. 4, pp. 507-17, Aug 2004, doi:  
493 10.1007/s00221-004-1864-7.
- 494 [37] S. J. Pearson, K. Burgess, and G. N. Onambele, "Creep and the in vivo assessment of  
495 human patellar tendon mechanical properties," *Clinical biomechanics*, vol. 22, no. 6, pp.  
496 712-717, 2007.
- 497 [38] W. H. Clark and J. R. Franz, "Activation-Dependent Changes in Soleus Length-Tension  
498 Behavior Augment Ankle Joint Quasi-Stiffness," *J Appl Biomech*, vol. 35, no. 3, pp. 182-  
499 189, Jun 1 2019, doi: 10.1123/jab.2018-0297.
- 500 [39] R. Riener and T. Edrich, "Identification of passive elastic joint moments in the lower  
501 extremities," *Journal of biomechanics*, vol. 32, no. 5, pp. 539-544, 1999.
- 502 [40] E. J. Rouse, L. J. Hargrove, E. J. Perreault, and T. A. Kuiken, "Estimation of human ankle  
503 impedance during the stance phase of walking," *IEEE Transactions on Neural Systems and*  
504 *Rehabilitation Engineering*, vol. 22, no. 4, pp. 870-878, 2014.
- 505 [41] E. J. Rouse, R. D. Gregg, L. J. Hargrove, and J. W. Sensinger, "The difference between  
506 stiffness and quasi-stiffness in the context of biomechanical modeling," *IEEE Transactions*  
507 *on Biomedical Engineering*, vol. 60, no. 2, pp. 562-568, 2012.
- 508 [42] G. Lichtwark and A. Wilson, "Is Achilles tendon compliance optimised for maximum  
509 muscle efficiency during locomotion?," *Journal of biomechanics*, vol. 40, no. 8, pp. 1768-  
510 1775, 2007.
- 511 [43] A. A. Biewener and T. J. Roberts, "Muscle and tendon contributions to force, work, and  
512 elastic energy savings: a comparative perspective," *Exerc Sport Sci Rev*, vol. 28, no. 3, pp.  
513 99-107, Jul 2000. [Online]. Available: <https://www.ncbi.nlm.nih.gov/pubmed/10916700>.
- 514 [44] R. L. Lieber and J. Fridén, "Functional and clinical significance of skeletal muscle  
515 architecture," *Muscle & Nerve: Official Journal of the American Association of*  
516 *Electrodiagnostic Medicine*, vol. 23, no. 11, pp. 1647-1666, 2000.
- 517 [45] S. J. Obst *et al.*, "Are the mechanical or material properties of the achilles and patellar  
518 tendons altered in tendinopathy? A systematic review with meta-analysis," *Sports*  
519 *medicine*, vol. 48, no. 9, pp. 2179-2198, 2018.
- 520 [46] G. L. Onambele, M. V. Narici, and C. N. Maganaris, "Calf muscle-tendon properties and  
521 postural balance in old age," *Journal of Applied Physiology*, 2006.
- 522 [47] L. Stenroth, J. Peltonen, N. J. Cronin, S. Sipilä, and T. Finni, "Age-related differences in  
523 Achilles tendon properties and triceps surae muscle architecture in vivo," *Journal of*  
524 *Applied Physiology*, vol. 113, no. 10, pp. 1537-1544, 2012.
- 525 [48] S. Bohm, F. Mersmann, and A. Arampatzis, "Human tendon adaptation in response to  
526 mechanical loading: a systematic review and meta-analysis of exercise intervention studies  
527 on healthy adults," *Sports medicine-open*, vol. 1, no. 1, p. 7, 2015. [Online]. Available:  
528 [https://www.ncbi.nlm.nih.gov/pmc/articles/PMC4532714/pdf/40798\\_2015\\_Article\\_9.pdf](https://www.ncbi.nlm.nih.gov/pmc/articles/PMC4532714/pdf/40798_2015_Article_9.pdf)  
529 .

- 530 [49] F. Mersmann, S. Bohm, and A. Arampatzis, "Imbalances in the development of muscle and  
531 tendon as risk factor for tendinopathies in youth athletes: a review of current evidence and  
532 concepts of prevention," *Frontiers in physiology*, vol. 8, p. 987, 2017.  
533  
534

535 **FIGURES**

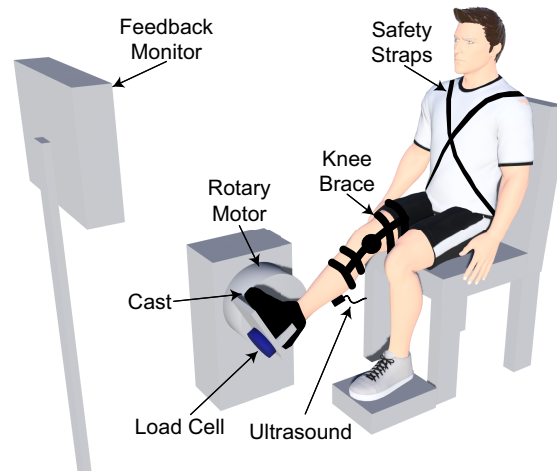

536

537 **Figure 1. Schematic of the experimental setup.** A custom-made cast secured the subject's foot to the rotary motor.  
538 The rotary motor rigidly controlled the ankle joint angle, while the load cell measured the resultant ankle torque. We  
539 used B-mode ultrasound to image the muscle-tendon junction of the medial gastrocnemius. The knee brace secured  
540 the knee in a stable position, preventing unwanted knee flexion or extension. The feedback monitor provided real-  
541 time feedback on the magnitude of the plantarflexion torque and the tibialis anterior muscle activity.  
542

542

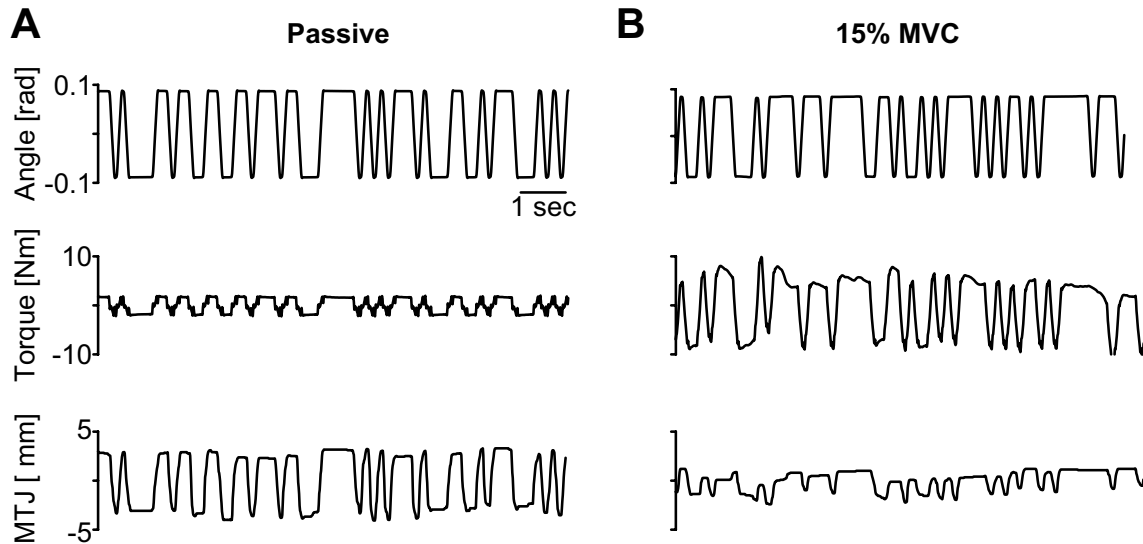

543

544 **Figure 2. Representative data used to estimate ankle, muscle, and tendon impedance.** Representative data from  
545 a passive trial (A) and a trial when the participant was instructed to maintain 15% of their maximum voluntary torque  
546 (MVC) (B). The rotary motor rigidly controlled the position of the participant's ankle (angle) at all times. We measured  
547 the resultant ankle torque and muscle-tendon junction (MTJ) displacement from the medial gastrocnemius resulting  
548 from the applied random perturbations. Torque and MTJ displacement have been detrended.  
549

549

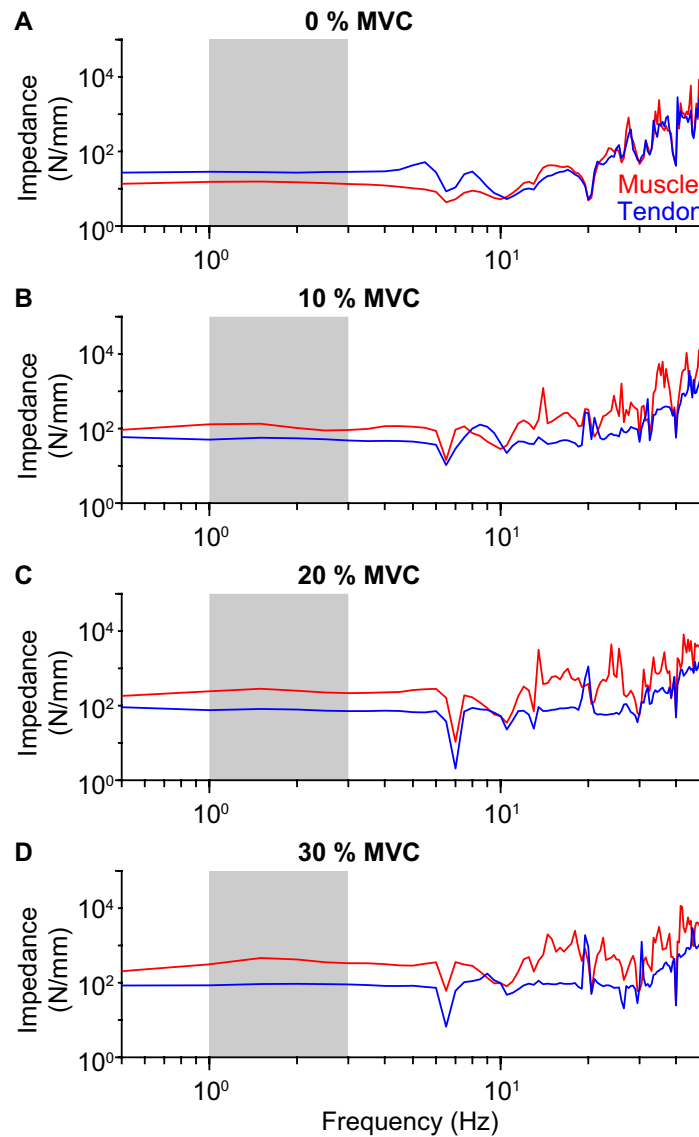

550

551 **Figure 3. Stiffness is the dominant contributor to muscle and tendon impedance at low frequencies.** Muscle (red)  
552 and tendon (blue) impedance frequency response functions from a representative participant at (A) 0% MVC, (B) 10%  
553 MVC, (C) 20% MVC, and (D) 30% MVC. The magnitudes of the frequency response functions were nearly constant  
554 from 1 – 6.5 Hz, indicating that stiffness is the primary contributor to impedance. Values between 1 – 3 Hz were used  
555 to compute stiffness (shaded region).

556

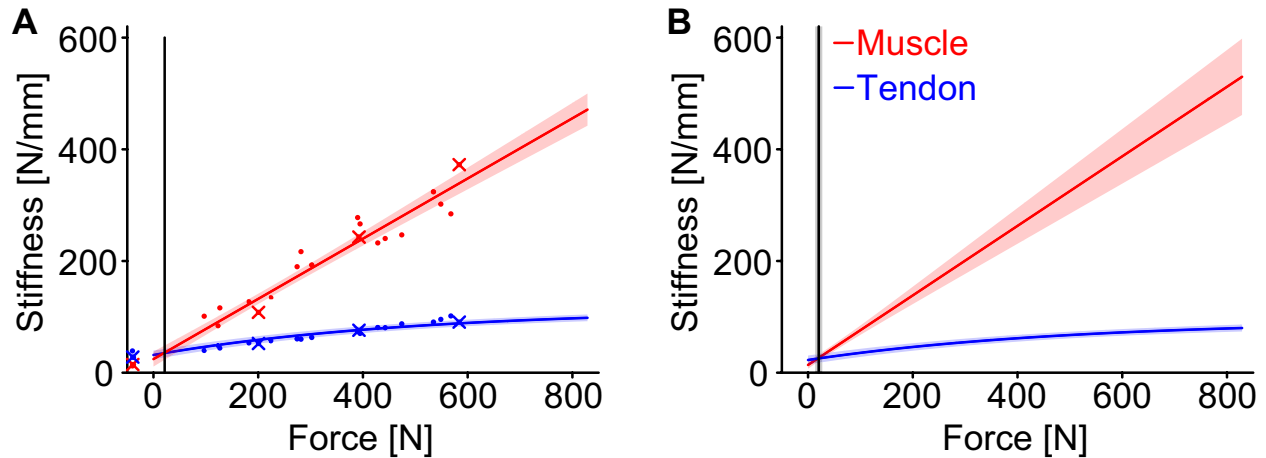

557

558 **Figure 4. Muscle stiffness exceeded tendon stiffness past the lowest levels of force.** (A) Muscle stiffness (red) and  
559 tendon stiffness (blue) for an individual subject, illustrating that muscle stiffness exceeded tendon stiffness at low  
560 levels of musculotendon force (21 N – solid black line). Each point represents an individual trial. The x's correspond  
561 to the trials illustrated in Fig 3. (B) This trend was preserved across all subjects (n=17). Muscle stiffness exceeded  
562 tendon stiffness at  $21 \pm 7$  N (mean  $\pm$  95% CI – solid line and shaded area). The tendon stiffness experimental data  
563 were modeled using Eq 2, while the muscle stiffness experimental data were modeled linearly. Mixed-effects models  
564 were used for muscle and tendon stiffness to account for random variability between subjects. The solid line indicates  
565 the estimated muscle and tendon stiffness from the respective mixed-effects models, with the shaded region being the  
566 95% confidence intervals. We evaluated the range of musculotendon forces when muscle and tendon stiffness were  
567 not significantly different from each other to a level of  $p > 0.05$  using a bootstrapping procedure. The solid black line  
568 was the mean musculotendon force where muscle and tendon stiffness were equivalent within the set level of statistical  
569 significance, with shading indicating the 95% confidence intervals across the bootstrapped samples.

570

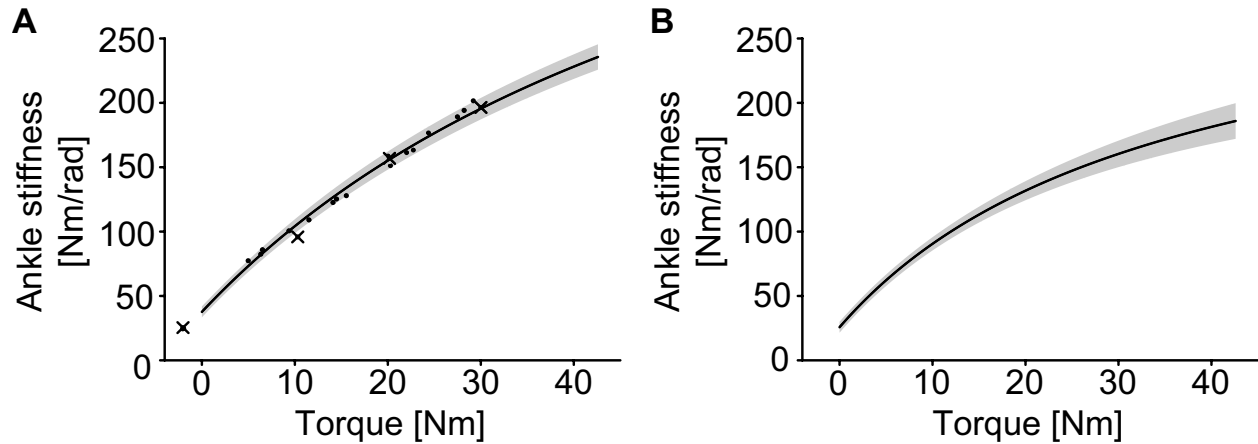

571  
572 **Figure 5. Ankle stiffness increased with increased plantarflexion torque.** A) Ankle stiffness estimates for an  
573 individual subject, illustrating the increase in stiffness with torque. Each point represents an individual trial. The x's  
574 correspond to the trials illustrated in Fig 3. This trend was preserved in the group results (n=17) (B). The ankle stiffness  
575 experimental data were modeled using Eq 1. A mixed-effects model was used to account for random variability  
576 between subjects. For all plots, the solid line indicates the estimated stiffness from the respective fitted model, with  
577 the shaded region being the 95% confidence intervals.

578  
579

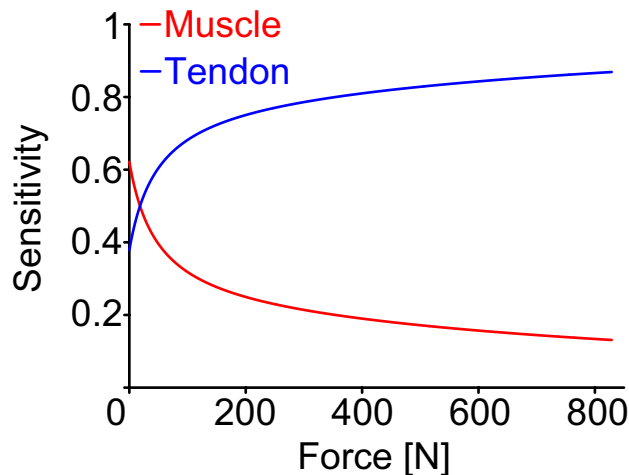

580  
581 **Figure 6. Sensitivity of ankle stiffness to changes in muscle (red) and tendon (blue) stiffness.** Beyond the lowest  
582 levels of force, ankle stiffness was more sensitive to changes in tendon stiffness compared to changes in muscle  
583 stiffness.
